# Supplementary material
Source: PubMed Central journal article supplement (PMC7770567)
Supplement: bloodBLD2020008206-suppl1.pdf [file bloodBLD2020008206-suppl1.pdf]

## SUPPLEMENTAL MATERIAL

### SUPPLEMENTAL FIGURE AND TABLE LEGENDS

**Supplemental Figure 1. Identification of Clonal Hematopoiesis (CH) in HLH.** (A) Age distribution in individuals who do not have a myeloid malignancy with and without clonal hematopoiesis in the cohort (shown are mean and S.E.M.). (B) Distribution of mutations identified in cohort. (C) Co-mutation plot depicting all mutations in which each column is a patient with clonal hematopoiesis, each row is a gene, and cells in gray reflect the presence of a mutation. (D) Frequency of CH with a VAF > 0.1 identified in HLH cohort and individuals from TOPMed cohort which utilized whole genome sequencing. Down-sampling analysis from TOPMed (Bick et al.) revealed identification of all cases of VAF > 0.1 but less than complete identification of cases with VAF > 0.02. We therefore chose a VAF > 0.1 for this analysis as our variant identification pipeline was also able to reliably detect all clones at that size.

**Supplemental Figure 2. Bone Marrow Derived Macrophage Response to ODN1826.** (A) Log-fold change (LFC) of cytokines measured in supernatants from *Tet2*-wildtype (WT) and *Tet2*-null (*Tet2*) BMDMs 24 hours after stimulation with vehicle (PBS) or ODN1826 (ODN).

**Supplemental Figure 3. Peripheral Blood and Bone Marrow Analysis of HLH Mouse Model.** Peripheral blood (A) and bone marrow (B) composition in each treatment group. (C) Representative flow plot of Lin<sup>lo</sup>Sca-1<sup>+</sup>c-Kit<sup>-</sup> cell population (population gated on live, lineage low population) in *Tet2*-wild-type treated and untreated mice.

**Supplemental Table 1. Genes Sequenced to Determine Presence of Clonal Hematopoiesis.**

**Supplemental Table 2. Clonal Hematopoietic Variants Identified in Cohort.**

**Supplemental Table 3. Additional Clinical Information for Cohort.**

**A**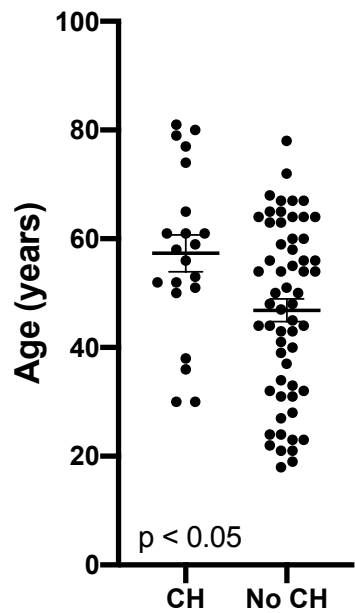**B**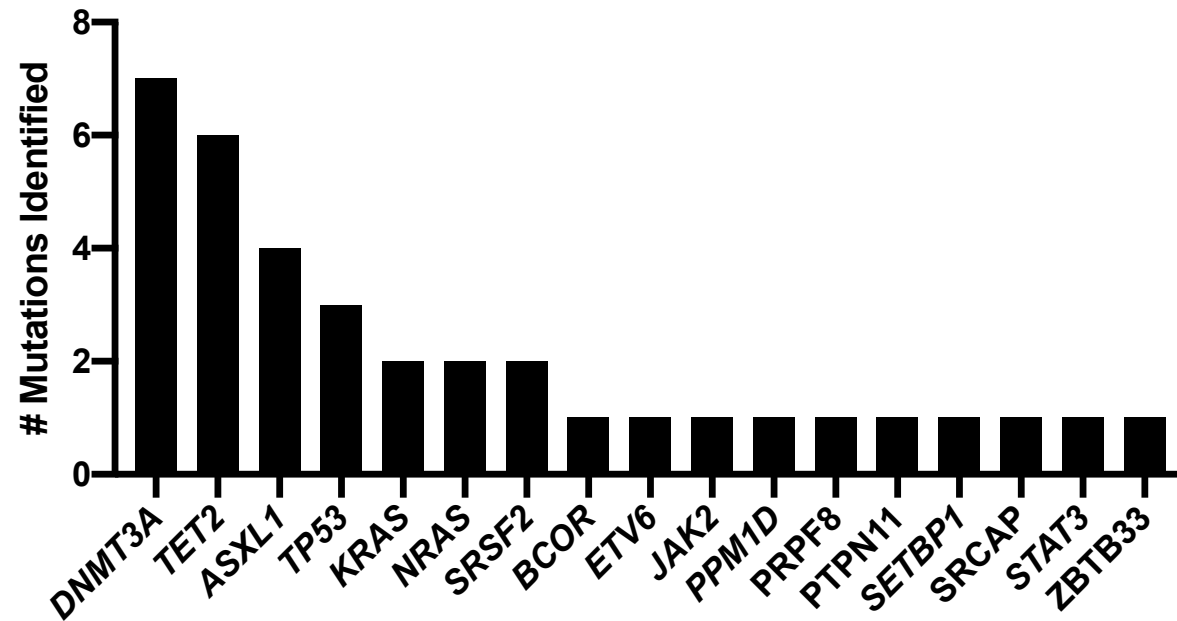**C**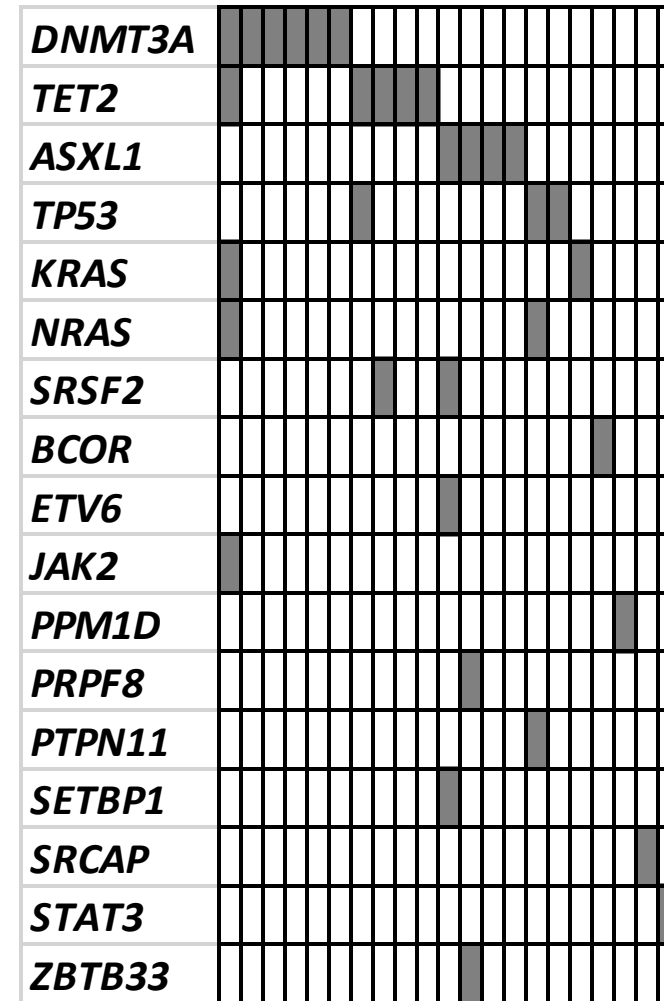**D**

| Cohort            | NGS Platform | Genes Sequenced | Frequency of CH (VAF > 0.1) |     |     |
|-------------------|--------------|-----------------|-----------------------------|-----|-----|
|                   |              |                 | All                         | <60 | >60 |
| Adult HLH         | Targeted     | 98              | 14%                         | 9%  | 25% |
| Bick et al (2020) | Whole Genome | Whole Genome    | 5%                          | 2%  | 9%  |

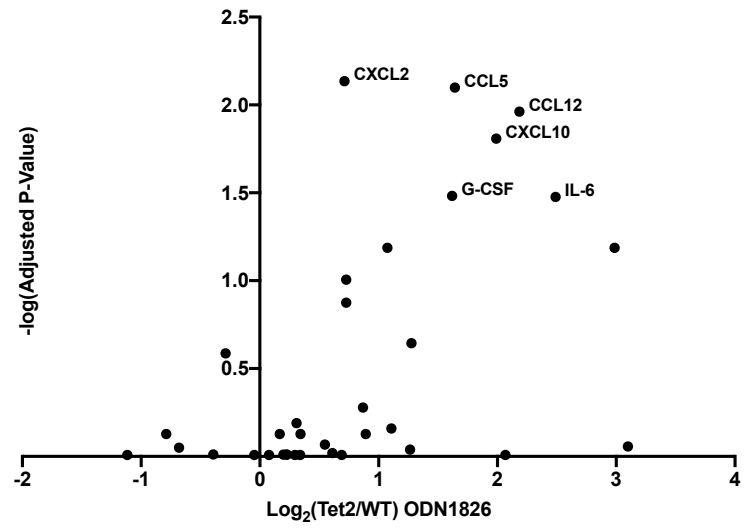

**A**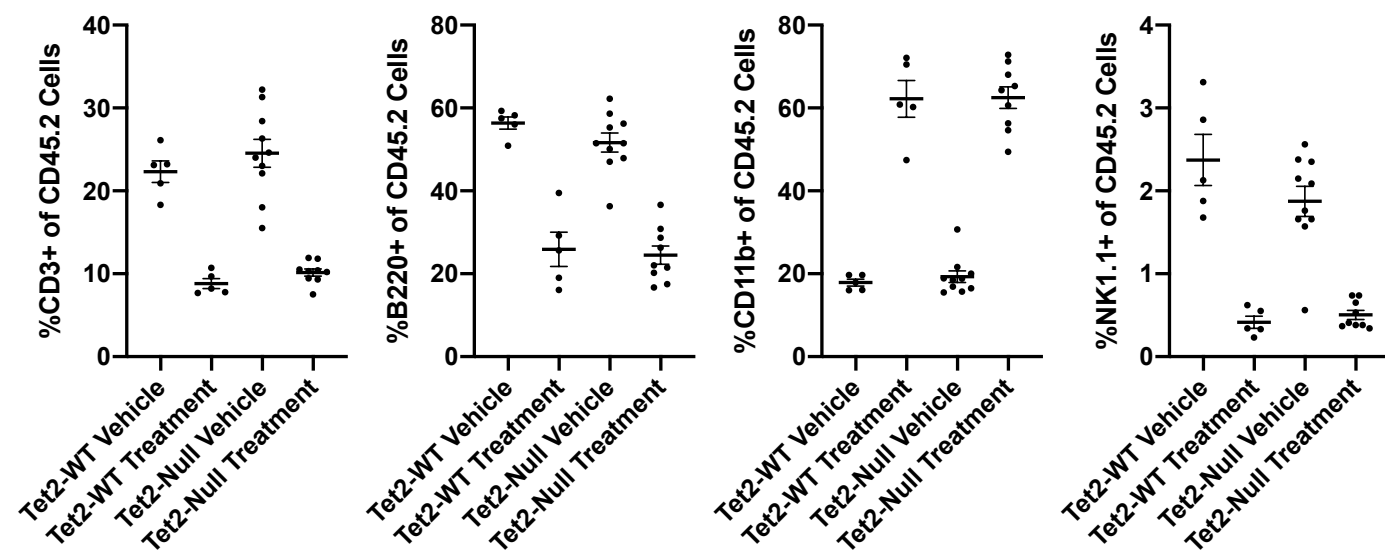**B**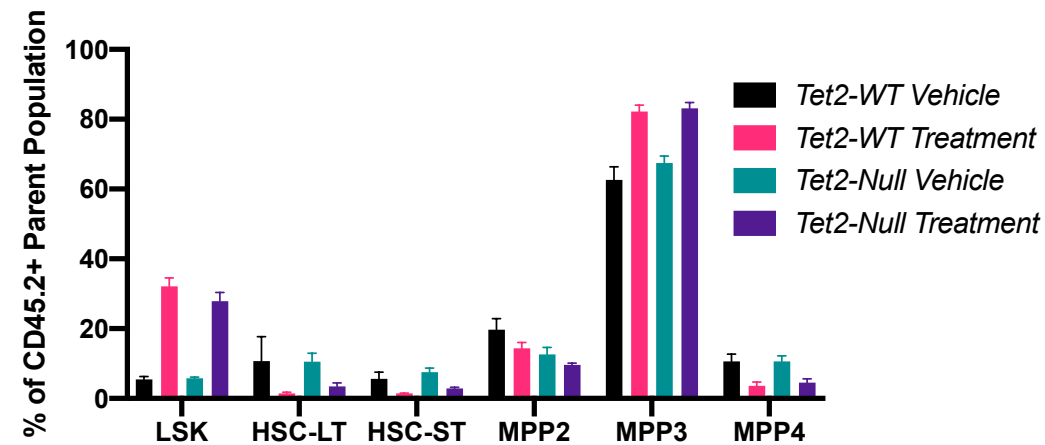**C**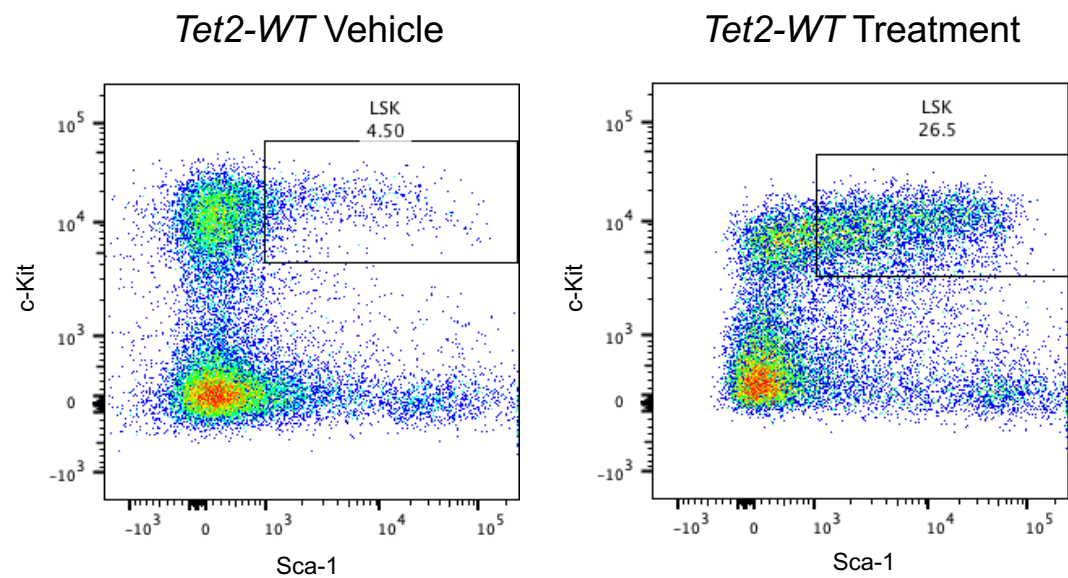

**Supplemental Table 1. Genes Sequenced to Determine Presence of Clonal Hematopoiesis.**

|         |        |         |         |        |          |
|---------|--------|---------|---------|--------|----------|
| ASXL1   | CTCF   | JAK2    | PDS5B   | SETBP1 | TNFAIP3  |
| ASXL2   | CUX1   | JAK3    | PHF6    | SETD2  | TNFRSF14 |
| ATM     | DDX41  | KIT     | PHIP    | SF1    | TP53     |
| ATRX    | DNMT3A | KRAS    | PIGA    | SF3A1  | U2AF1    |
| B2M     | EP300  | LUC7L2  | PIGT    | SF3B1  | U2AF2    |
| BCOR    | ETNK1  | MIR-142 | PPM1D   | SH2B3  | VPS45    |
| BCORL1  | ETV6   | MPL     | PRPF40B | SMC1A  | WT1      |
| BRAF    | EZH2   | MRE11A  | PRPF8   | SMC3   | YLPM1    |
| BRCC3   | FANCL  | MYC     | PTEN    | SRCAP  | ZBTB33   |
| CALR_E9 | FLT3   | MYD88   | PTPN11  | SRSF2  | ZFHX3    |
| CBL     | GATA1  | MYH9    | PTPRF   | STAG1  | ZNF318   |
| CBLB    | GATA2  | NF1     | RAD21   | STAG2  | ZRSR2    |
| CEBPA   | GNAS   | NOTCH1  | RASGRF1 | STAT3  |          |
| CREBBP  | GNB1   | NOTCH2  | RIT1    | STAT5B |          |
| CSF1R   | IDH1   | NPM1    | RPL11   | TERC   |          |
| CSF3R   | IDH2   | NRAS    | RPS7    | TERT   |          |
| CSNK1A1 | IKZF1  | NXF1    | RUNX1   | TET2   |          |

**Supplemental Table 2. Clonal Hematopoietic Variants Identified in Cohort.**

| chrom | pos_start | pos_end   | ref | var | gene   | cdna           | aa       | result               | reads1 | reads2 | var_freq |
|-------|-----------|-----------|-----|-----|--------|----------------|----------|----------------------|--------|--------|----------|
| 20    | 31022441  | 31022441  | -   | G   | ASXL1  | c.1927dupG     | p.G642fs | frameshift insertion | 1019   | 77     | 0.0692   |
| 20    | 31023008  | 31023011  | 0   | -   | ASXL1  | c.2493_2496del | p.L831fs | frameshift deletion  | 1011   | 36     | 0.0344   |
| 20    | 31021211  | 31021211  | C   | T   | ASXL1  | c.C1210T       | p.R404X  | stopgain             | 540    | 207    | 0.2756   |
| 20    | 31022837  | 31022837  | A   | -   | ASXL1  | c.2322delA     | p.R774fs | frameshift deletion  | 333    | 285    | 0.4553   |
| X     | 39934363  | 39934363  | C   | -   | BCOR   | c.236delG      | p.R79fs  | frameshift deletion  | 480    | 18     | 0.0361   |
| 2     | 25467083  | 25467083  | G   | A   | DNMT3A | c.C1792T       | p.R598X  | stopgain             | 545    | 545    | 0.5      |
| 2     | 25457243  | 25457243  | G   | A   | DNMT3A | c.C2644T       | p.R882C  | nonsynonymous SNV    | 771    | 16     | 0.0203   |
| 2     | 25463290  | 25463290  | A   | C   | DNMT3A | c.T2203G       | p.Y735D  | nonsynonymous SNV    | 888    | 18     | 0.02     |
| 2     | 25470582  | 25470582  | C   | A   | DNMT3A | c.G892T        | p.G298W  | nonsynonymous SNV    | 306    | 8      | 0.0255   |
| 2     | 25466800  | 25466800  | G   | A   | DNMT3A | c.C1903T       | p.R635W  | nonsynonymous SNV    | 235    | 37     | 0.136    |
| 2     | 25467117  | 25467117  | G   | T   | DNMT3A | c.C1758A       | p.C586X  | stopgain             | 829    | 41     | 0.047    |
| 2     | 25463182  | 25463182  | G   | A   | DNMT3A | c.C2311T       | p.R771X  | stopgain             | 265    | 206    | 0.4364   |
| 12    | 12006399  | 12006399  | C   | T   | ETV6   | c.C367T        | p.Q123X  | stopgain             | 322    | 258    | 0.4441   |
| 9     | 5073770   | 5073770   | G   | T   | JAK2   | c.G1849T       | p.V617F  | nonsynonymous SNV    | 686    | 46     | 0.0628   |
| 12    | 25398285  | 25398285  | C   | T   | KRAS   | c.G34A         | p.G12S   | nonsynonymous SNV    | 726    | 56     | 0.0714   |
| 12    | 25368410  | 25368410  | C   | T   | KRAS   | c.G535A        | p.G179S  | nonsynonymous SNV    | 263    | 201    | 0.4332   |
| 1     | 1.15E+08  | 115256528 | T   | G   | NRAS   | c.A183C        | p.Q61H   | nonsynonymous SNV    | 918    | 24     | 0.0255   |
| 1     | 1.15E+08  | 115258747 | C   | T   | NRAS   | c.G35A         | p.G12D   | nonsynonymous SNV    | 855    | 19     | 0.0217   |
| 17    | 58740897  | 58740900  | 0   | -   | PPM1D  | c.1802_1805del | p.T601fs | frameshift deletion  | 330    | 250    | 0.431    |
| 17    | 1576446   | 1576446   | C   | A   | PRPF8  | c.G3703T       | p.E1235X | stopgain             | 625    | 14     | 0.0219   |
| 12    | 1.13E+08  | 112940059 | G   | C   | PTPN11 | c.G1711C       | p.E571Q  | nonsynonymous SNV    | 505    | 95     | 0.1581   |
| 18    | 42531907  | 42531907  | G   | A   | SETBP1 | c.G2602A       | p.D868N  | nonsynonymous SNV    | 185    | 137    | 0.4241   |
| 16    | 30732137  | 30732137  | G   | T   | SRCAP  | c.G3091T       | p.E1031X | stopgain             | 583    | 12     | 0.0202   |
| 17    | 74732959  | 74732959  | G   | A   | SRSF2  | c.C284T        | p.P95L   | nonsynonymous SNV    | 197    | 155    | 0.4391   |
| 17    | 74732959  | 74732959  | G   | A   | SRSF2  | c.C284T        | p.P95L   | nonsynonymous SNV    | 418    | 24     | 0.0543   |
| 17    | 40474482  | 40474482  | T   | A   | STAT3  | c.A1919T       | p.Y640F  | nonsynonymous SNV    | 564    | 12     | 0.0208   |
| 4     | 1.06E+08  | 106157649 | T   | -   | TET2   | c.2550delT     | p.H850fs | frameshift deletion  | 959    | 51     | 0.0503   |
| 4     | 1.06E+08  | 106155982 | -   | C   | TET2   | c.884dupC      | p.A295fs | frameshift insertion | 662    | 482    | 0.4141   |
| 4     | 1.06E+08  | 106157012 | T   | -   | TET2   | c.1913delT     | p.M638fs | frameshift deletion  | 492    | 384    | 0.4262   |
| 4     | 1.06E+08  | 106180774 | A   | T   | TET2   | c.3804-2A>T    |          | splicing             | 507    | 417    | 0.4513   |
| 4     | 1.06E+08  | 106193728 | C   | T   | TET2   | c.C4190T       | p.T1397I | nonsynonymous SNV    | 838    | 26     | 0.0301   |
| 4     | 1.06E+08  | 106155938 | -   | T   | TET2   | c.840dupT      | p.S280fs | frameshift insertion | 775    | 148    | 0.1591   |
| 17    | 7578524   | 7578524   | G   | A   | TP53   | c.C406T        | p.Q136X  | stopgain             | 505    | 112    | 0.1815   |
| 17    | 7577539   | 7577539   | G   | A   | TP53   | c.C742T        | p.R248W  | nonsynonymous SNV    | 226    | 568    | 0.7154   |
| 17    | 7578268   | 7578268   | A   | C   | TP53   | c.T581G        | p.L194R  | nonsynonymous SNV    | 704    | 57     | 0.0749   |
| X     | 1.19E+08  | 119388018 | C   | A   | ZBTB33 | c.C748A        | p.P250T  | nonsynonymous SNV    | 264    | 7      | 0.0258   |

**Supplemental Table 3. Additional Clinical Information for Cohort.**

|                                         | <b>All (N=80)</b> | <b>CH (N=21)</b> | <b>No CH (N=59)</b> |
|-----------------------------------------|-------------------|------------------|---------------------|
| <b>Malignancy</b>                       | 35                | 12               | 23                  |
| Hematologic Malignancy                  | 35                | 12               | 23                  |
| T-Cell                                  | 11                | 4                | 7                   |
| B-Cell                                  | 24                | 8                | 16                  |
| Plasma Cell                             | 1                 | 1                | 0                   |
| Solid Organ Malignancy                  | 3                 | 1                | 2                   |
| <b>Autoimmune Disease</b>               |                   |                  |                     |
| Immune Thrombocytopenia Purpura         | 2                 | 1                | 1                   |
| Juvenile Idiopathic Arthritis           | 2                 | 0                | 2                   |
| Systemic Lupus Erythematosus            | 2                 | 0                | 2                   |
| Adult-Onset Still's Disease             | 2                 | 0                | 2                   |
| Autoimmune Hemolytic Anemia             | 1                 | 0                | 1                   |
| Autoimmune Lymphoproliferative Syndrome | 1                 | 1                | 0                   |
| Autoimmune Thyroiditis                  | 1                 | 0                | 1                   |
| Crohn's                                 | 1                 | 1                | 0                   |
| Juvenile Rheumatoid Arthritis           | 1                 | 1                | 0                   |
| Mixed Connective Tissue Disease         | 1                 | 0                | 1                   |
| Rheumatoid Arthritis                    | 1                 | 0                | 1                   |
| <b>Infection</b>                        |                   |                  |                     |
| EBV                                     | 16                | 4                | 12                  |
| CMV                                     | 5                 | 1                | 4                   |
| Babesia                                 | 1                 | 0                | 1                   |
| HBV                                     | 1                 | 0                | 1                   |
| HIV                                     | 1                 | 0                | 1                   |
| VZV                                     | 1                 | 0                | 1                   |
